# Supplementary material
Source: ML conference proceedings conference paper supplement (https://openreview.net/forum?id=GClrNUTqly)
Supplement: supplementary_material [file attachment]

## A Technical Appendices and Supplementary Material

### A.1 Equations for Conformational Energy Landscape Overlap Analysis

To quantify the similarity between the protein conformations generated by AI-based models and those in the ProteinConformers dataset, the following three commonly used overlap metrics are employed: Interaction overlap, coverage, and the Jaccard index. These metrics evaluate the extent of agreement in low-energy regions between the protein conformers from different models of the same protein, based on a specified energy threshold.

Let  $A = \{A_{i,j}\}$  and  $B = \{B_{i,j}\}$  where  $i, j \in [0, N]$ , denote the two-dimensional free energy landscapes corresponding of two conformational ensembles. Each element  $A_{i,j}$  and  $B_{i,j}$  represents the free energy value at a specific grid point in the conformational energy landscape. For a given energy threshold  $\tau$  (e.g., 40 kJ/mol), the number of shared low-energy conformations is defined as:

$$|A \cap B| = \sum_{i,j=1}^N \mathbf{1}[A_{i,j} < \tau \wedge B_{i,j} < \tau]$$

where  $N = 63$ , and  $\mathbf{1}[\cdot]$  is the indicator function, which returns 1 if the condition inside is true and 0 otherwise.

The low energy area of different conformational free energy landscape under different threshold are given by:

$$|A| = \sum_{i,j=1}^N \mathbf{1}[A_{i,j} < \tau], \quad |B| = \sum_{i,j=1}^N \mathbf{1}[B_{i,j} < \tau]$$

Using the above definitions, the overlap metrics are computed as follows:

- **Interaction:**

$$\text{Interaction} = |A \cap B|$$

- **Coverage** (proportion of low-energy conformations in  $A$  also found in  $B$ ):

$$\text{Coverage} = \frac{|A \cap B|}{|A|}$$

- **Jaccard Index** (symmetric overlap metric between both sets):

$$\text{Jaccard} = \frac{|A \cap B|}{|A| + |B| - |A \cap B|}$$

### A.2 Free Energy Landscapes Comparison

This section provides additional figures comparing the conformational landscapes of protein conformers from ProteinConformers with those generated by AI models.

### A.3 Overview the ProteinConformers proteins

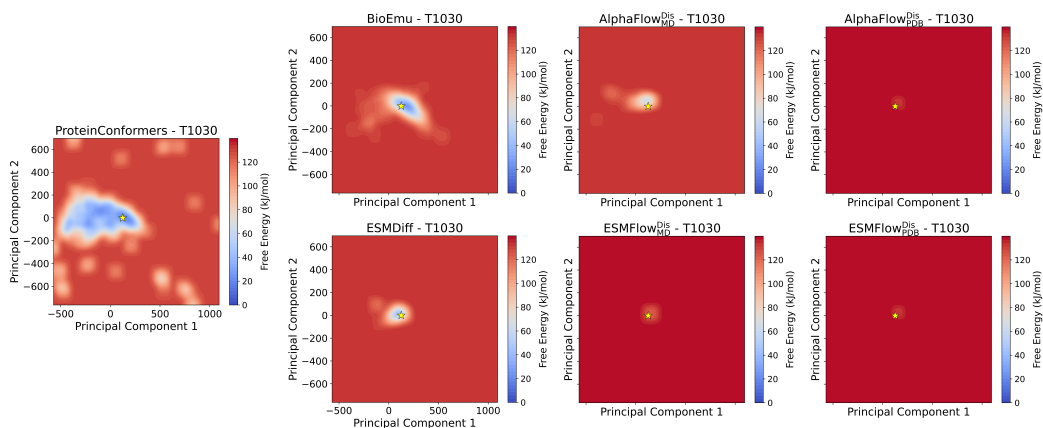

(a) Comparison of 2D conformational landscapes.

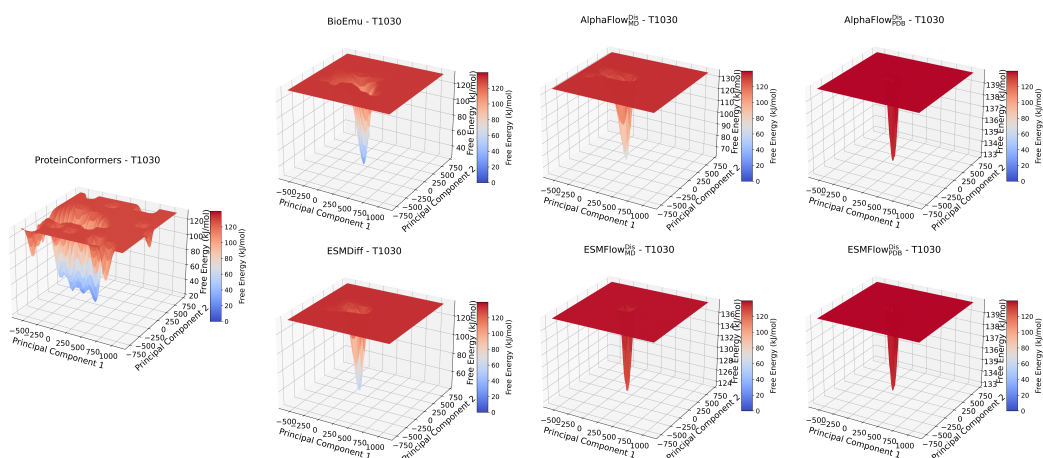

(b) Comparison of 3D conformational landscapes.

Figure 6: Comparison of conformational landscapes for protein T1030, generated by ProteinConformers and protein conformation generative models.



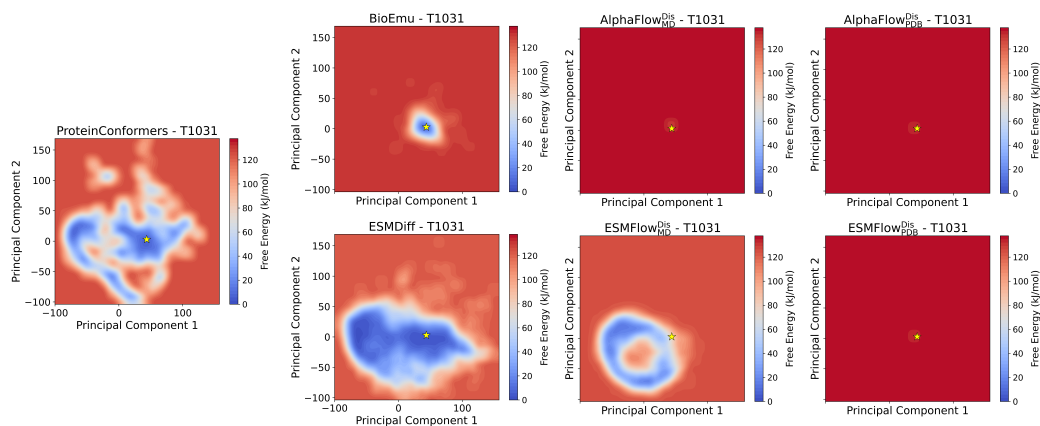

(a) Comparison of 2D conformational landscapes.

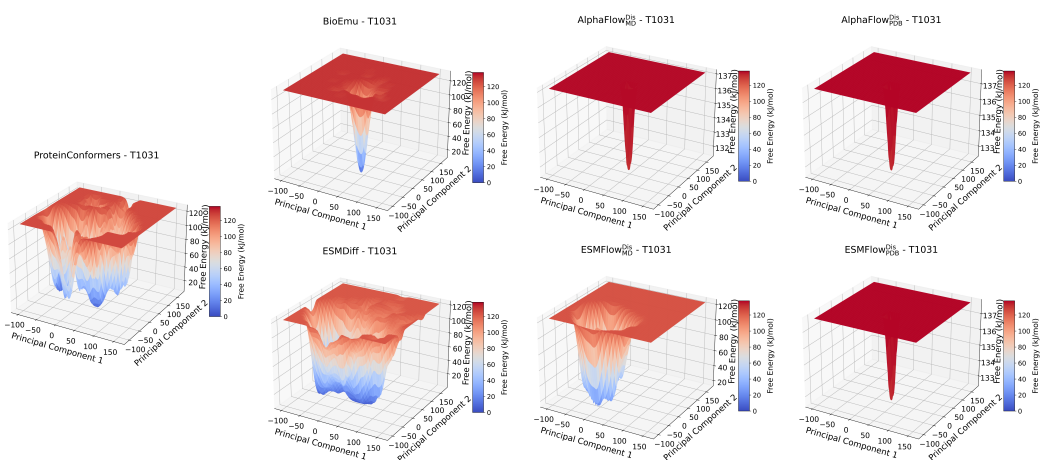

(b) Comparison of 3D conformational landscapes.

Figure 7: Comparison of conformational landscapes for protein T1031, generated by ProteinConformers and protein conformation generative models.

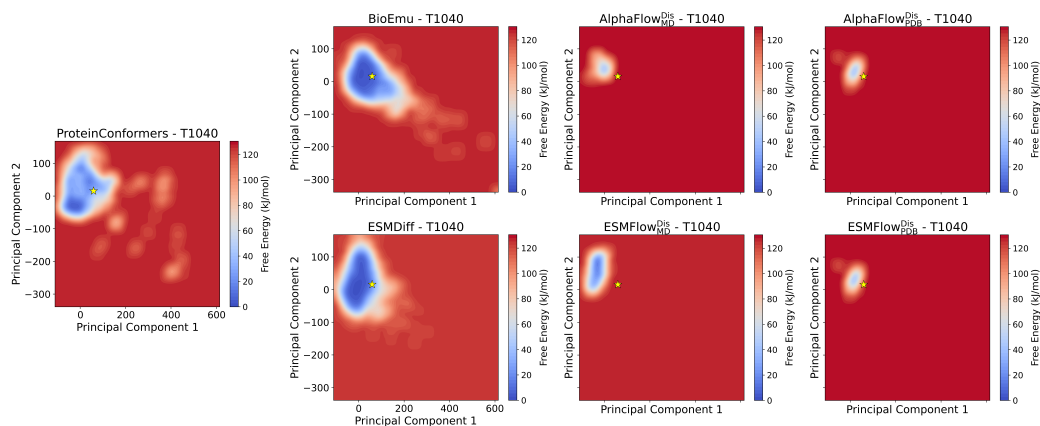

(a) Comparison of 2D conformational landscapes.

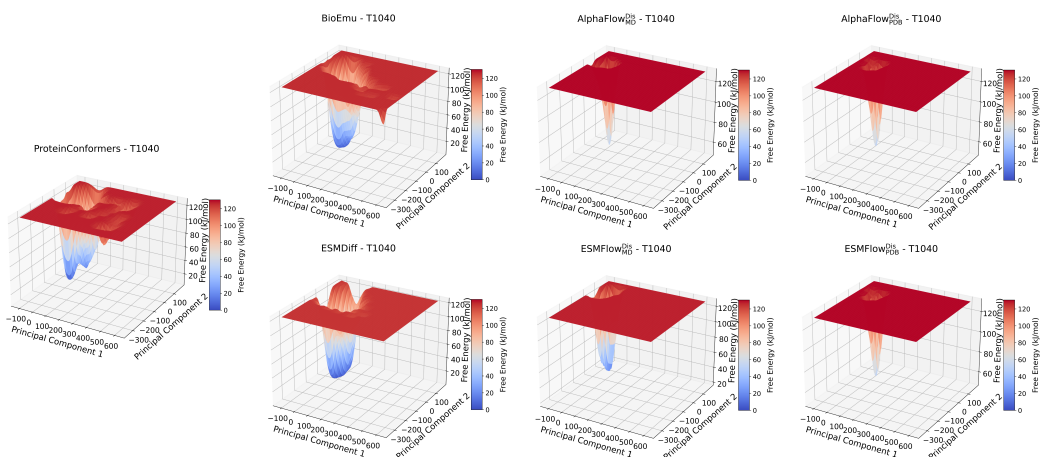

(b) Comparison of 3D conformational landscapes.

Figure 8: Comparison of conformational landscapes for protein T1040, generated by ProteinConformers and protein conformation generative models.

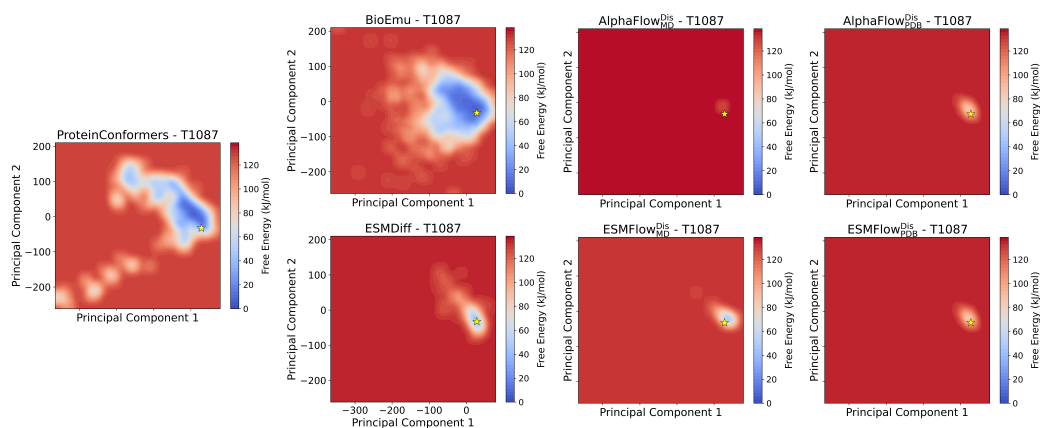

(a) Comparison of 2D conformational landscapes.

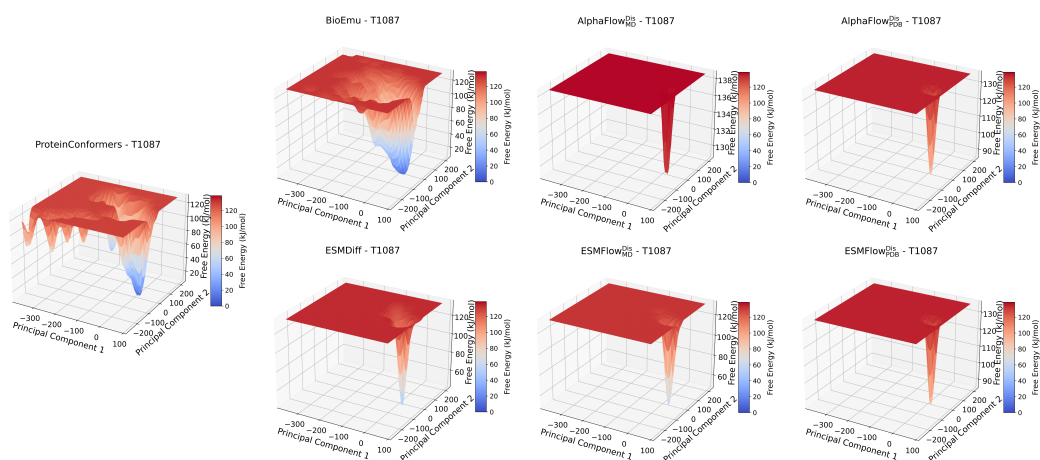

(b) Comparison of 3D conformational landscapes.

Figure 9: Comparison of conformational landscapes for protein T1087, generated by ProteinConformers and protein conformation generative models.

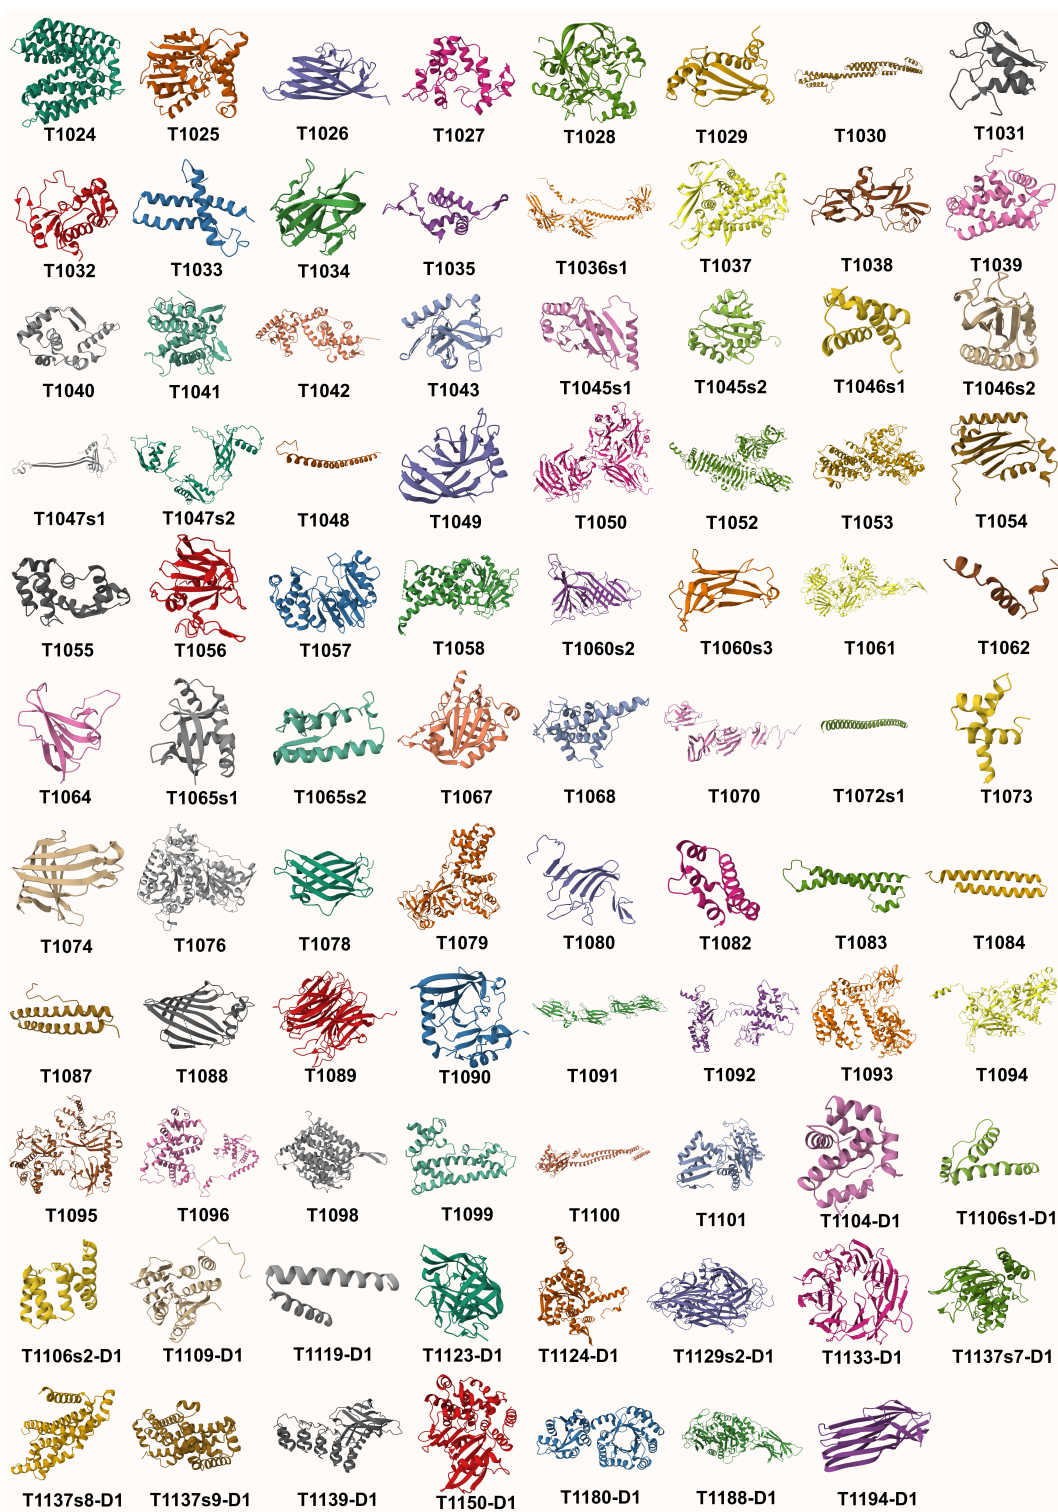

Figure 10: The 3D native structures of all 87 proteins in ProteinConformers.
